# Supplementary material
Source: PubMed Central journal article supplement (PMC3116619)
Supplement: sgtp0201_0004SD1.pdf [file sgtp0201_0004SD1.pdf]

Supplementary material Table 1: Genomes

| <b>Species</b>                        | <b>Description</b> | <b>Genome source</b>      | <b>Genome version</b>               | <b>Downloaded</b> | <b>References</b> |
|---------------------------------------|--------------------|---------------------------|-------------------------------------|-------------------|-------------------|
| <i>Homo sapiens</i>                   | Human              | EnsEMBL                   | NCBI 36                             | 06-30-08          | [1, 2]            |
| <i>Mus musculus</i>                   | Mouse              | EnsEMBL                   | NCBI m37 Apr 2007                   | 06-30-08          | [3]               |
| <i>Ornithorhynchus anatinus</i>       | Platypus           | EnsEMBL                   | v5.0, Dec 2005                      | 06-30-08          | [4]               |
| <i>Gallus gallus</i>                  | Bird               | EnsEMBL                   | WASHUC2, May 2006                   | 06-30-08          | [5]               |
| <i>Xenopus tropicalis</i>             | Amphibian          | EnsEMBL                   | JGI 4.1, Aug 2005                   | 06-30-08          | [6]               |
| <i>Danio rerio</i>                    | Zebrafish          | EnsEMBL                   | Zv7, Apr 2007                       | 06-30-08          | [7]               |
| <i>Fugu rubripes</i>                  | Puffer fish        | EnsEMBL                   | FUGU 4.0, Jun 2005                  | 06-30-08          | [8]               |
| <i>Branchiostoma floridae</i>         | Cephalochordate    | JGI                       | v.1.0 (December 5, 2006)            | 08-06-08          | [9]               |
| <i>Ciona intestinalis</i>             | Sea squirt         | EnsEMBL                   | JGI 2, Mar 2005                     | 06-30-08          | [10]              |
| <i>Strongylocentrotus purpuratus</i>  | Sea urchin         | Sea Urchin Genome Project | Spur 2.1, Sep 2006                  | 07-30-08          | [11]              |
| <i>Caenorhabditis elegans</i>         | Nematode           | EnsEMBL                   | WS190, Apr 2008                     | 07-30-08          | [12]              |
| <i>Anopheles gambiae</i>              | Mosquito           | EnsEMBL                   | AgamP3, February 2006               | 08-07-08          | [13]              |
| <i>Drosophila melanogaster</i>        | Fruit fly          | EnsEMBL                   | BDGP 5.4, Nov 2007                  | 07-30-08          | [14]              |
| <i>Lottia gigantea</i>                | Snale              | JGI                       | v1.0 (July 24, 2007)                | 08-06-08          | [15]              |
| <i>Daphnia pulex</i>                  | Crustacea          | JGI                       | v.1.0 (July 5, 2007) frozen catalog | 08-06-08          | [15]              |
| <i>Nematostella vectensis</i>         | Sae anemone        | JGI                       | JGI v1.0                            | 07-30-08          | [16]              |
| <i>Trichoplax adhaerens</i>           | Placozoon          | JGI                       | JGI v1.0 22 July 2007               | 07-30-08          | [17]              |
| <i>Monosiga brevicollis</i>           | Choanoflagellate   | JGI                       | JGI v1.0 July 2006                  | 07-30-08          | [18]              |
| <i>Encephalitozoon cuniculi</i>       | Microsporidium     | EMBL                      | EMBL                                | 07-30-08          | [19]              |
| <i>Batrachochytrium dendrobatidis</i> | Chytridiomycete    | BROAD                     | BROAD 3/1/2007                      | 07-30-08          | [20]              |
| <i>Phycomyces blakesleeanus</i>       | Zygomycete         | JGI                       | JGI v1.0 January 8, 2007            | 07-30-08          | [15]              |
| <i>Rhizopus oryzae</i>                | Zygomycete         | BROAD                     | RO3 12/6/05                         | 07-30-08          | [21]              |
| <i>Laccaria bicolor</i>               | Basidiomycete      | JGI                       | JGI v1.0 May 22, 2006               | 07-30-08          | [22]              |
| <i>Phanerochaete chrysosporium</i>    | Basidiomycete      | JGI                       | JGI v2.0 February 2005              | 07-30-08          | [23]              |
| <i>Cryptococcus neoformans</i>        | Basidiomycete      | BROAD                     | BROAD v3.0 2/17/2006                | 07-30-08          | [24]              |
| <i>Ustilago maydis</i>                | Basidiomycete      | BROAD                     | BROAD v2.0 April 1, 2004            | 07-30-08          | [25]              |
| <i>Schizosaccharomyces pombe</i>      | Fission yeast      | Sanger                    | Sanger v19 07/16/2008               | 07-30-08          | [26]              |
| <i>Yarrowia lipolytica</i>            | Hemiascomycete     | Genolevures               | V 2                                 | 08-06-08          | [27]              |
| <i>Debaryomyces hansenii</i>          | Hemiascomycete     | Genolevures               | V 1                                 | 08-06-08          | [27]              |
| <i>Candida guilliermondii</i>         | Hemiascomycete     | BROAD                     | V 1                                 | 08-06-08          | [28]              |
| <i>Eremothecium gossypii</i>          | Hemiascomycete     | EMBL                      |                                     | 08-06-08          | [29]              |
| <i>Candida glabrata</i>               | Hemiascomycete     | Genolevures               | V 2                                 | 08-06-08          | [27]              |
| <i>Kluyveromyces lactis</i>           | Hemiascomycete     | Genolevures               | V 2                                 | 08-06-08          | [27]              |
| <i>Saccharomyces cerevisiae</i>       | Baker's yeast      | SGD                       | SGD 06/06/2008                      | 07-30-08          | [30]              |
| <i>Aspergillus terreus</i>            | Pezizomycete       | BROAD                     | BROAD v1.0                          | 08-01-08          | [31]              |
| <i>Coccidioides immitis</i>           | Pezizomycete       | BROAD                     | C. immitis RS v2                    | 08-01-08          | [32]              |
| <i>Fusarium graminearum</i>           | Pezizomycete       | BROAD                     | BROAD v3                            | 08-01-08          | [33]              |
| <i>Neurospora crassa</i>              | Pezizomycete       | BROAD                     | BROAD v7                            | 08-01-08          | [34]              |

Supplementary material Table 1: Genomes

|                                         |                 |                               |                             |          |          |
|-----------------------------------------|-----------------|-------------------------------|-----------------------------|----------|----------|
| <i>Sclerotinia sclerotiorum</i>         | Pezizomycete    | BROAD                         | BROAD v2.0                  | 08-01-08 | [35]     |
| <i>Dictyostelium discoideum</i>         | Amoebozoan      | DictyDB                       | created: 03-01-2009 01:29   | 03-05-09 | [36, 37] |
| <i>Cyanidioschyzon merolae</i>          | Red algae       | C. merolae Genome Project     | April 13 2004 (ORF)         | 08-07-08 | [38]     |
| <i>Ostreococcus tauri</i>               | Green algae     | JGI                           | JGI v2                      | 08-01-08 | [39]     |
| <i>Chlamydomonas reinhardtii</i>        | Green algae     | JGI                           | JGI v3.1                    | 08-01-08 | [40]     |
| <i>Volvox carteri</i>                   | Green algae     | JGI                           | JGI v1.0 June 1, 2007       | 08-01-08 | [41]     |
| <i>Physcomitrella patens ssp patens</i> | Moss            | JGI                           | v.1.1 (March 2007)          | 08-06-08 | [42]     |
| <i>Selaginella moellendorffii</i>       | Lycophyte       | JGI                           | v1.0 (December 20, 2007)    | 08-06-08 | [15]     |
| <i>Oryza sativa</i>                     | Plant monocotyl | Rice Genome Annotation (TIGR) | v5 TIGR January 24, 2007    | 08-01-08 | [43]     |
| <i>Arabidopsis thaliana</i>             | Plant dicotyl   | Arabidopsis genome initiative | TIER v8                     | 08-01-08 | [44]     |
| <i>Populus trichocarpa</i>              | Plant dicotyl   | JGI                           | v1.0 (June 2004)            | 08-07-08 | [45]     |
| <i>Phaeodactylum tricorutum</i>         | Diatom          | JGI                           | v.2.0 (November 16, 2006)   | 08-06-08 | [46]     |
| <i>Thalassiosira pseudonana</i>         | Diatom          | JGI                           | v3.0 (August 2006)          | 08-06-08 | [47]     |
| <i>Phytophthora sojae</i>               | Oomycete        | JGI                           | v1.0 (April 2004)           | 08-06-08 | [48]     |
| <i>Phytophthora infestans</i>           | Oomycete        | BROAD                         | 03-14-07                    | 08-06-08 | [49]     |
| <i>Emiliania huxleyi CCMP1516</i>       | Coccolithophore | JGI                           | v.1.0 (April 25, 2008)      | 08-06-08 | [15]     |
| <i>Aureococcus anophagefferens</i>      | Pelagophyte     | JGI                           | JGI v1.0 September 27, 2007 | 08-06-08 | [15]     |
| <i>Paramecium tetraurelia</i>           | Ciliate         | ParameciumDB                  | V1.21 07/29/2008            | 08-06-08 | [50]     |
| <i>Tetrahymena thermophila</i>          | Ciliate         | TIGR                          | Aug 2004                    | 08-06-08 | [51]     |
| <i>Cryptosporidium parvum</i>           | Apicomplexa     | CryptoDB                      | CryptoDB 3.7                | 08-06-08 | [52]     |
| <i>Plasmodium falciparum</i>            | Apicomplexa     | PlasmoDB                      | 5,5                         | 08-06-08 | [53]     |
| <i>Theileria parva</i>                  | Apicomplexa     | TIGR                          | 1                           | 08-06-08 | [54]     |
| <i>Naegleria gruberi</i>                | Heterolobosea   | JGI                           | v.1.0 (October 23, 2006)    | 08-06-08 | [55]     |
| <i>Trichomonas vaginalis</i>            | Parabasalid     | TIGR                          | 02-15-07                    | 08-06-08 | [56, 57] |
| <i>Giardia intestinalis</i>             | Diplomonad      | GiardiaDB                     | V1.1 may 2008               | 08-06-08 | [57]     |
| <i>Leishmania major</i>                 | Kinetoplastid   | Sanger                        | 11-05-06                    | 08-06-08 | [58]     |
| <i>Trypanosoma brucei</i>               | Kinetoplastid   | Sanger                        | May 08 v4                   | 08-06-08 | [59]     |

## References

1. Lander ES, Linton LM, Birren B, Nusbaum C, Zody MC, et al. (2001) Initial sequencing and analysis of the human genome. *Nature* 409: 860-921.
2. Venter JC, Adams MD, Myers EW, Li PW, Mural RJ, et al. (2001) The sequence of the human genome. *Science (New York, N.Y.)* 291: 1304-51.
3. Waterston RH, Lindblad-Toh K, Birney E, Rogers J, Abril JF, et al. (2002) Initial sequencing and comparative analysis of the mouse genome. *Nature* 420: 520-62.
4. Warren WC, Hillier LW, Marshall Graves JA, Birney E, Ponting CP, et al. (2008) Genome analysis of the platypus reveals unique signatures of evolution. *Nature* 453: 175-83.
5. Wallis JW, Aerts J, Groenen MA, Crooijmans RP, Layman D, et al. (2004) A physical map of the chicken genome. *Nature* 432: 761-4.
6. Hellsten U, Harland RM, Gilchrist MJ, Hendrix D, Jurka J, et al. (2010) The Genome of the Western Clawed Frog *Xenopus tropicalis*. *Science* 328: 633-636.
7. Hubbard TJ, Aken BL, Ayling S, Ballester B, Beal K, et al. (2009) Ensembl 2009. *Nucleic Acids Res* 37: D690-7.
8. Aparicio S, Chapman J, Stupka E, Putnam N, Chia JM, et al. (2002) Whole-genome shotgun assembly and analysis of the genome of *Fugu rubripes*. *Science* 297: 1301-1310.
9. Putnam NH, Butts T, Ferrier DE, Furlong RF, Hellsten U, et al. (2008) The amphioxus genome and the evolution of the chordate karyotype. *Nature* 453: 1064-71.
10. Dehal P, Satou Y, Campbell RK, Chapman J, Degnan B, et al. (2002) The draft genome of *Ciona intestinalis*: insights into chordate and vertebrate origins. *Science (New York, N.Y.)* 298: 2157-67.
11. Cameron RA, Samanta M, Yuan A, He D, Davidson E (2009) SpBase: the sea urchin genome database and web site. *Nucleic Acids Res* 37: D750-4.

Supplementary material Table 1: Genomes

12. The *C. elegans* Sequencing Consortium (1998) Genome Sequence of the Nematode *C. elegans*: A Platform for Investigating Biology. *Science* 282: 2012-2018.
13. Holt RA, Subramanian GM, Halpern A, Sutton GG, Charlab R, et al. (2002) The genome sequence of the malaria mosquito *Anopheles gambiae*. *Science (New York, N.Y.)* 298: 129-49.
14. Adams MD (2000) The Genome Sequence of *Drosophila melanogaster*. *Science* 287: 2185-2195.
15. These sequence data were produced by the US Department of Energy Joint Genome Institute <http://www.jgi.doe.gov/> in collaboration with the user community.
16. Putnam NH, Srivastava M, Hellsten U, Dirks B, Chapman J, et al. (2007) Sea anemone genome reveals ancestral eumetazoan gene repertoire and genomic organization. *Science (New York, N.Y.)* 317: 86-94.
17. Srivastava M, Begovic E, Chapman J, Putnam NH, Hellsten U, et al. (2008) The *Trichoplax* genome and the nature of placozoans. *Nature* 454: 955-960.
18. King N, Westbrook MJ, Young SL, Kuo A, Abedin M, et al. (2008) The genome of the choanoflagellate *Monosiga brevicollis* and the origin of metazoans. *Nature* 451: 783-788.
19. Katinka MD, Duprat S, Cornillot E, Metenier G, Thomarat F, et al. (2001) Genome sequence and gene compaction of the eukaryote parasite *Encephalitozoon cuniculi*. *Nature* 414: 450-453.
20. *Batrachochytrium dendrobatidis* Sequencing Project. Broad Institute of Harvard and MIT (<http://www.broad.mit.edu>).
21. *Rhizopus oryzae* Sequencing Project. Broad Institute of Harvard and MIT (<http://www.broad.mit.edu>).
22. Martin F, Aerts A, Ahren D, Brun A, Danchin EG, et al. (2008) The genome of *Laccaria bicolor* provides insights into mycorrhizal symbiosis. *Nature* 452: 88-92.
23. Martinez D, Larrondo LF, Putnam N, Gelpke MD, Huang K, et al. (2004) Genome sequence of the lignocellulose degrading fungus *Phanerochaete chrysosporium* strain RP78. *Nat Biotechnol* 22: 695-700.

Supplementary material Table 1: Genomes

24. *C. neoformans* Genome Project, Stanford Genome Technology Center, funded by the NIAID/NIH under cooperative agreement AI47087, and The Institute for Genomic Research, funded by the NIAID/NIH under cooperative agreement U01 AI48594.
25. Kämper J, Kahmann R, Bölker M, Ma L, Brefort T, et al. (2006) Insights from the genome of the biotrophic fungal plant pathogen *Ustilago maydis*. *Nature* 444: 97-101.
26. Wood V, Gwilliam R, Rajandream MA, Lyne M, Lyne R, et al. (2002) The genome sequence of *Schizosaccharomyces pombe*. *Nature* 415: 871-880.
27. Sherman DJ, Martin T, Nikolski M, Cayla C, Souciet JL, et al. (2009) Genolevures: protein families and synteny among complete hemiascomycetous yeast proteomes and genomes. *Nucleic Acids Res* 37: D550-4.
28. *Candida guilliermondii* Sequencing Project. Broad Institute of Harvard and MIT (<http://www.broad.mit.edu>).
29. Dietrich FS, Voegeli S, Brachat S, Lerch A, Gates K, et al. (2004) The *Ashbya gossypii* genome as a tool for mapping the ancient *Saccharomyces cerevisiae* genome. *Science* 304: 304-307.
30. Cherry JM, Ball C, Weng S, Juvik G, Schmidt R, et al. (1997) Genetic and physical maps of *Saccharomyces cerevisiae*. *Nature* 387: 67-73.
31. *Aspergillus* Comparative Genome Project. Broad Institute of Harvard and MIT (<http://www.broad.mit.edu>).
32. *Coccidioides immitis* Sequencing Project. Broad Institute of Harvard and MIT (<http://www.broad.mit.edu>).
33. Cuomo CA, Guldener U, Xu JR, Trail F, Turgeon BG, et al. (2007) The *Fusarium graminearum* genome reveals a link between localized polymorphism and pathogen specialization. *Science* 317: 1400-1402.
34. Galagan JE, Calvo SE, Borkovich KA, Selker EU, Read ND, et al. (2003) The genome sequence of the filamentous fungus *Neurospora crassa*. *Nature* 422: 859-868.
35. *Sclerotinia sclerotiorum* Sequencing Project. Broad Institute of Harvard and MIT (<http://www.broad.mit.edu>).

Supplementary material Table 1: Genomes

36. Fey P, Gaudet P, Curk T, Zupan B, Just EM, et al. (2009) dictyBase--a Dictyostelium bioinformatics resource update. *Nucleic Acids Res* 37: D515-9.
37. Eichinger L, Pachebat JA, Glockner G, Rajandream MA, Sucgang R, et al. (2005) The genome of the social amoeba *Dictyostelium discoideum*. *Nature* 435: 43-57.
38. Nozaki H, Takano H, Misumi O, Terasawa K, Matsuzaki M, et al. (2007) A 100%-complete sequence reveals unusually simple genomic features in the hot-spring red alga *Cyanidioschyzon merolae*. *BMC Biol* 5: 28.
39. Palenik B, Grimwood J, Aerts A, Rouzé P, Salamov A, et al. (2007) The tiny eukaryote *Ostreococcus* provides genomic insights into the paradox of plankton speciation. *Proceedings of the National Academy of Sciences of the United States of America* 104: 7705-10.
40. Merchant SS, Prochnik SE, Vallon O, Harris EH, Karpowicz SJ, et al. (2007) The *Chlamydomonas* genome reveals the evolution of key animal and plant functions. *Science* 318: 245-250.
41. Prochnik SE, Umen J, Nedelcu AM, Hallmann A, Miller SM, et al. (2010) Genomic Analysis of Organismal Complexity in the Multicellular Green Alga *Volvox carteri*. *Science* 329: 223-226.
42. Rensing SA, Lang D, Zimmer AD, Terry A, Salamov A, et al. (2008) The *Physcomitrella* genome reveals evolutionary insights into the conquest of land by plants. *Science (New York, N.Y.)* 319: 64-9.
43. Ouyang S, Zhu W, Hamilton J, Lin H, Campbell M, et al. (2007) The TIGR Rice Genome Annotation Resource: improvements and new features. *Nucleic Acids Res* 35: D883-7.
44. Swarbreck D, Wilks C, Lamesch P, Berardini TZ, Garcia-Hernandez M, et al. (2008) The Arabidopsis Information Resource (TAIR): gene structure and function annotation. *Nucleic Acids Res* 36: D1009-14.
45. Tuskan GA, Difazio S, Jansson S, Bohlmann J, Grigoriev I, et al. (2006) The genome of black cottonwood, *Populus trichocarpa* (Torr. & Gray). *Science (New York, N.Y.)* 313: 1596-604.
46. Bowler C, Allen AE, Badger JH, Grimwood J, Jabbari K, et al. (2008) The *Phaeodactylum* genome reveals the evolutionary history of diatom genomes. *Nature* 456: 239-244.

Supplementary material Table 1: Genomes

47. Armbrust EV, Berges JA, Bowler C, Green BR, Martinez D, et al. (2004) The genome of the diatom *Thalassiosira pseudonana*: ecology, evolution, and metabolism. *Science* 306: 79-86.
48. Tyler BM, Tripathy S, Zhang X, Dehal P, Jiang RH, et al. (2006) *Phytophthora* Genome Sequences Uncover Evolutionary Origins and Mechanisms of Pathogenesis. *Science* 313: 1261-1266.
49. Haas BJ, Kamoun S, Zody MC, Jiang RH, Handsaker RE, et al. (2009) Genome sequence and analysis of the Irish potato famine pathogen *Phytophthora infestans*. *Nature* 461: 393-8.
50. Aury JM, Jaillon O, Duret L, Noel B, Jubin C, et al. (2006) Global trends of whole-genome duplications revealed by the ciliate *Paramecium tetraurelia*. *Nature* 444: 171-178.
51. Eisen JA, Coyne RS, Wu M, Wu D, Thiagarajan M, et al. (2006) Macronuclear Genome Sequence of the Ciliate *Tetrahymena thermophila*, a Model Eukaryote. *PLoS Biology* 4: e286.
52. Heiges M, Wang H, Robinson E, Aurrecochea C, Gao X, et al. (2006) CryptoDB: a *Cryptosporidium* bioinformatics resource update. *Nucleic Acids Res* 34: D419-22.
53. Aurrecochea C, Brestelli J, Brunk BP, Dommer J, Fischer S, et al. (2009) PlasmoDB: a functional genomic database for malaria parasites. *Nucleic acids research* 37: D539-43.
54. Gardner MJ, Bishop R, Shah T, de Villiers EP, Carlton JM, et al. (2005) Genome sequence of *Theileria parva*, a bovine pathogen that transforms lymphocytes. *Science* 309: 134-137.
55. Fritz-Laylin LK, Prochnik SE, Ginger ML, Dacks JB, Carpenter ML, et al. (2010) The Genome of *Naegleria gruberi* Illuminates Early Eukaryotic Versatility. *Cell* 140: 631-642.
56. Carlton JM, Hirt RP, Silva JC, Delcher AL, Schatz M, et al. (2007) Draft genome sequence of the sexually transmitted pathogen *Trichomonas vaginalis*. *Science* 315: 207-212.
57. Aurrecochea C, Brestelli J, Brunk BP, Carlton JM, Dommer J, et al. (2009) GiardiaDB and TrichDB: integrated genomic resources for the eukaryotic protist pathogens *Giardia lamblia* and *Trichomonas vaginalis*. *Nucleic Acids Res* 37: D526-30.

Supplementary material Table 1: Genomes

58. Ivens AC, Peacock CS, Worthey EA, Murphy L, Aggarwal G, et al. (2005) The genome of the kinetoplastid parasite, *Leishmania major*. *Science* (New York, N.Y.) 309: 436-42.
59. Berriman M, Ghedin E, Hertz-Fowler C, Blandin G, Renauld H, et al. (2005) The genome of the African trypanosome *Trypanosoma brucei*. *Science* 309: 416-422.



# Figure S1: Phylogenetic tree of the RapGAP domain and domain architecture of full length sequences

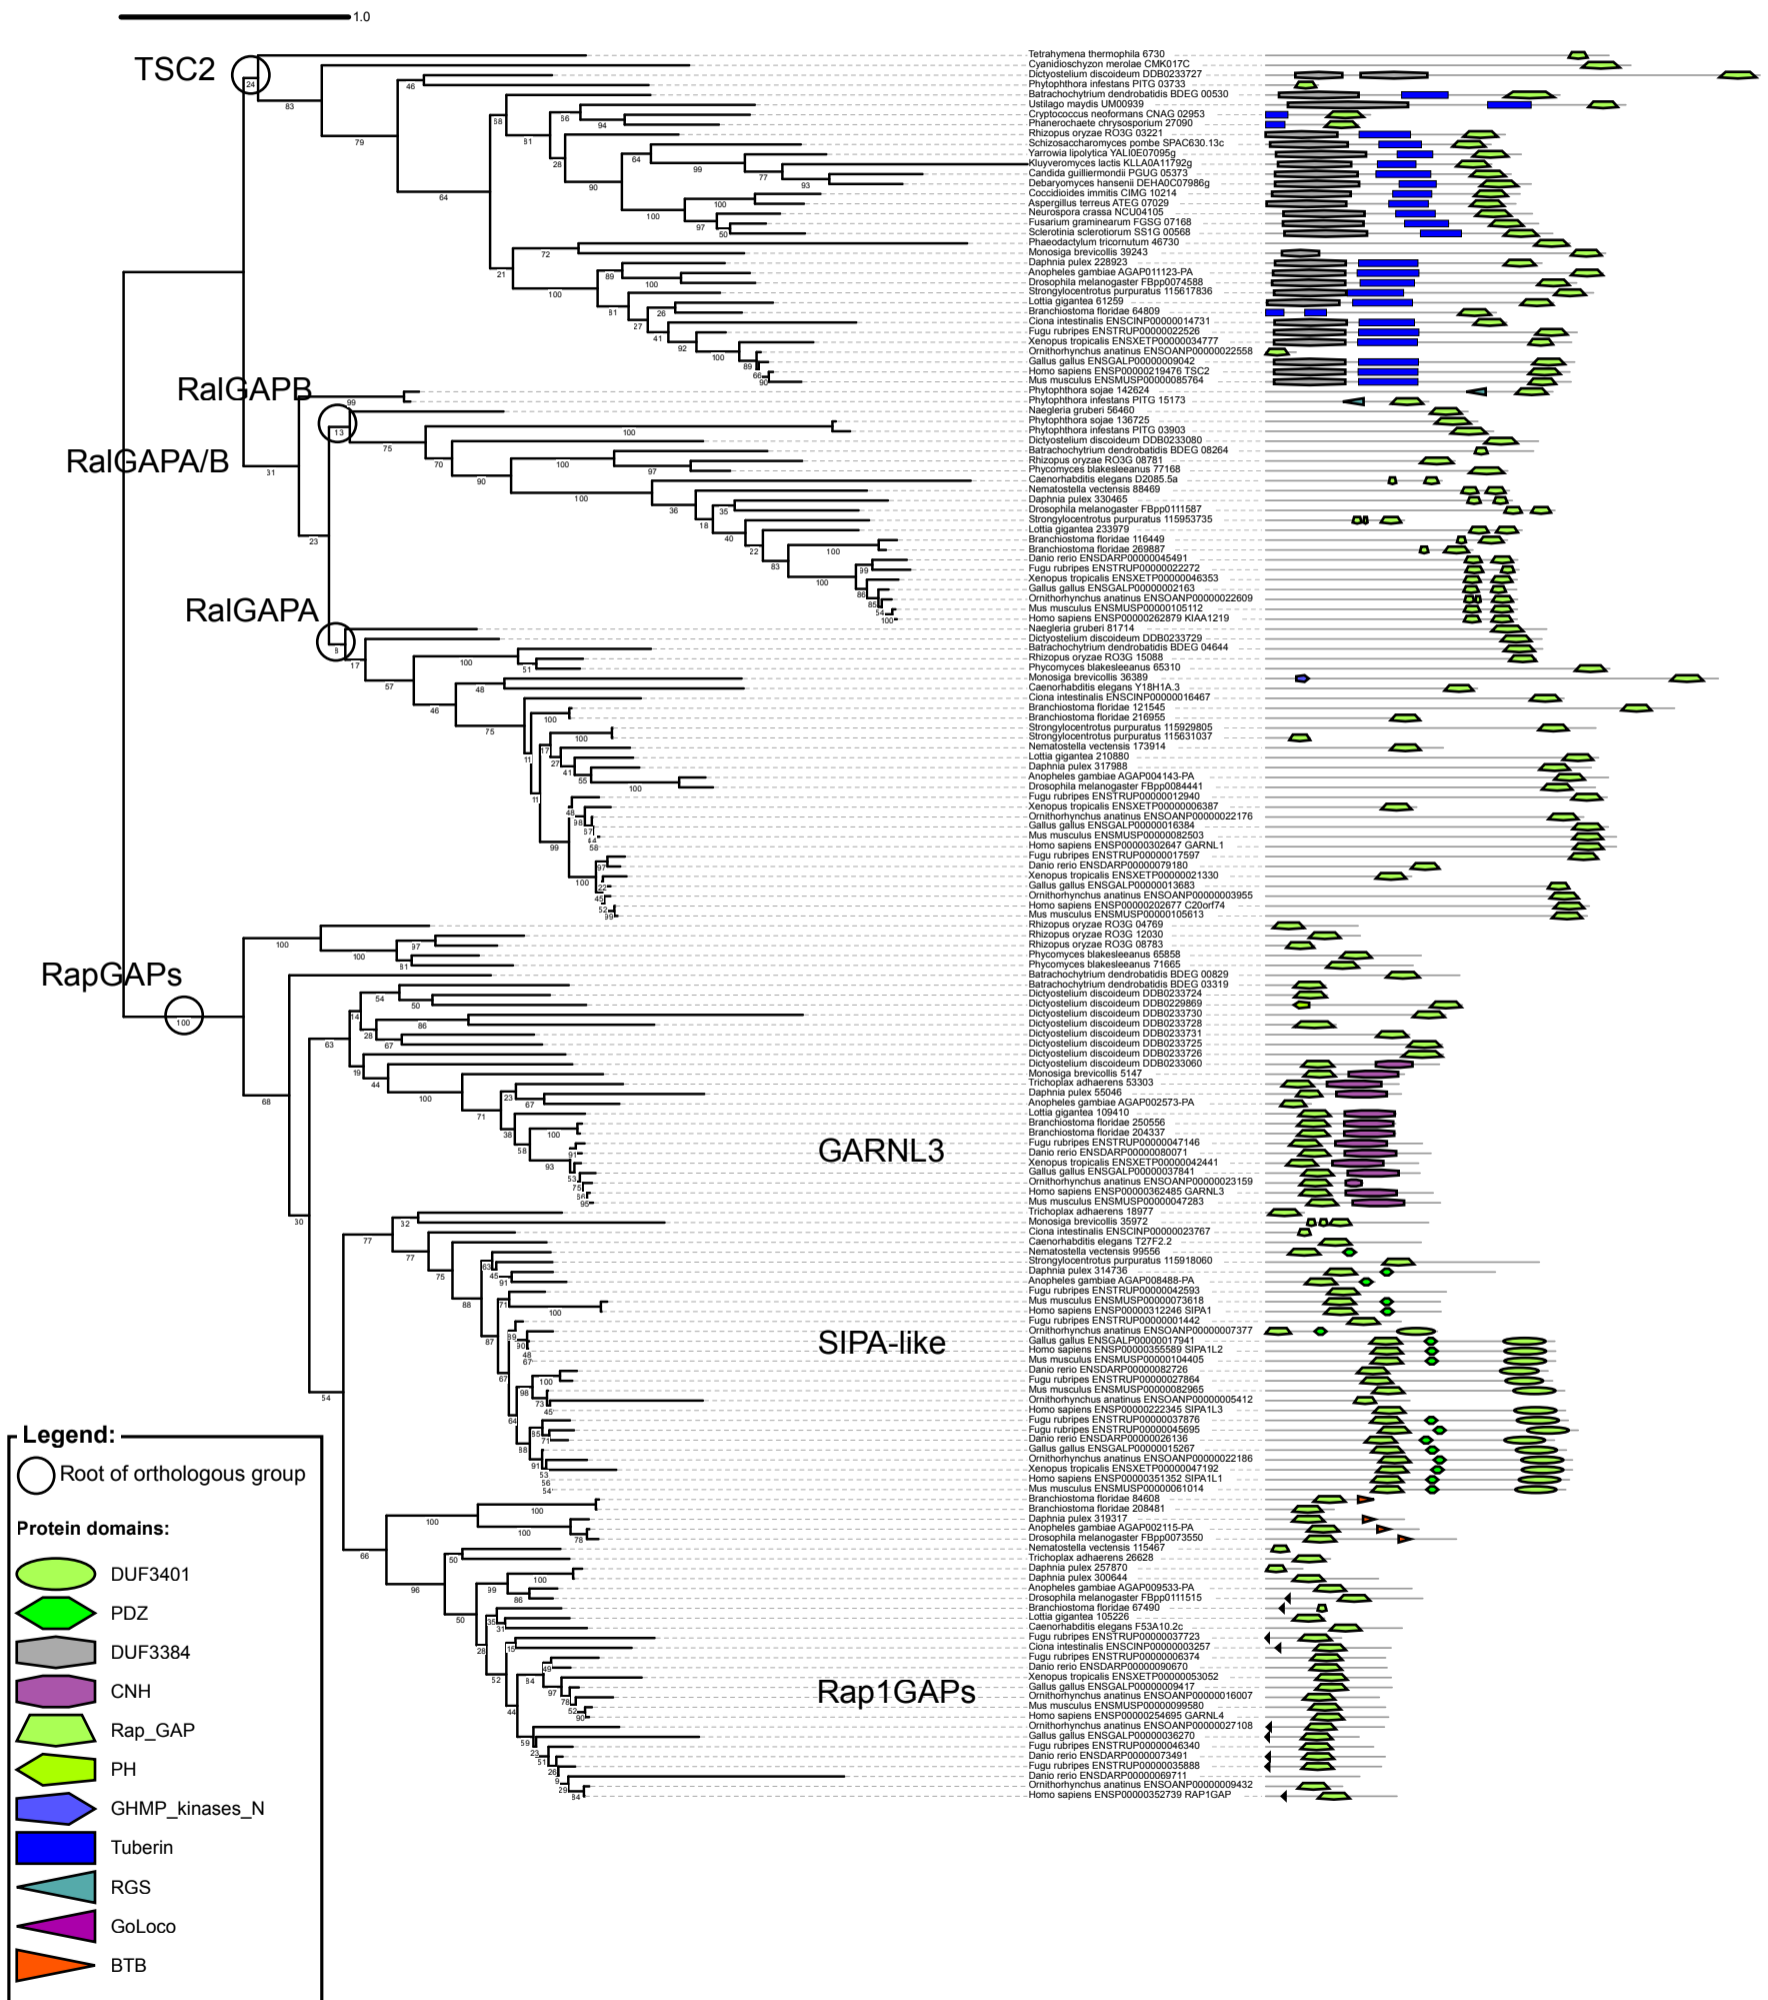

(Best viewed electronically)



# Figure S3: Phylogenetic tree of the species used in this analysis

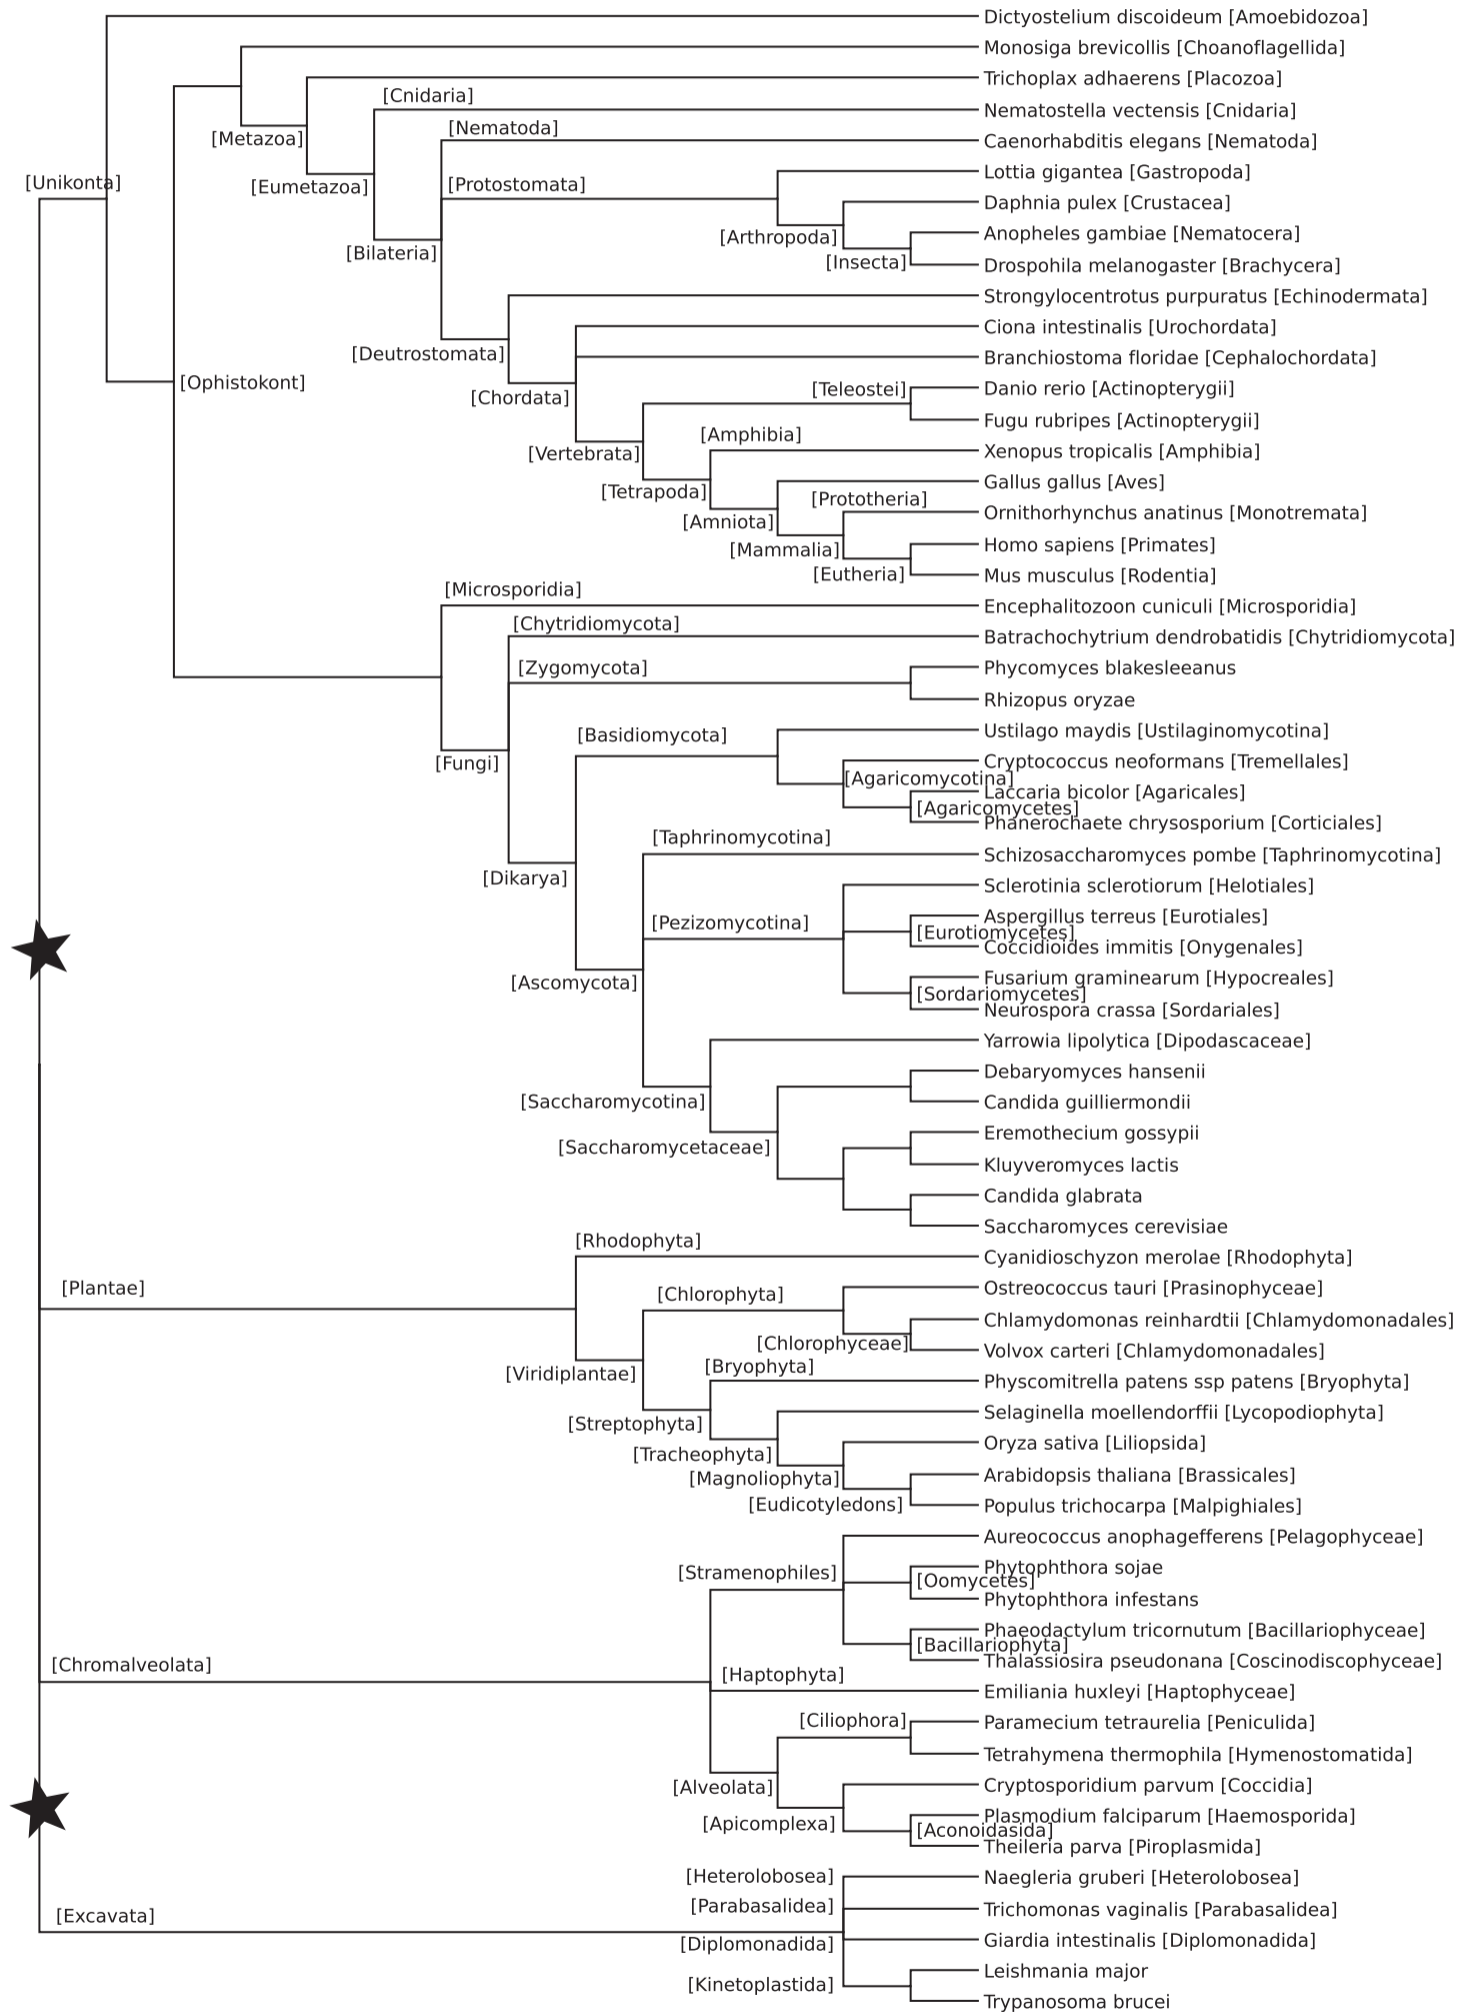

Phylogenetic tree of all species used in this analysis. The phylogeny is based on Simpson et al. 2006 and NCBI Taxonomy. The stars indicate possible roots for the eukaryotic species tree.
